# Supplementary material
Source: publisher figshare collection journal article supplement (https://acs.figshare.com/ndownloader/files/4715173)
Supplement: Supplementary file 1 [file 4715173]

## Supporting information

### Defect-Free Polymer Multilayers Prepared via Chemoselective Immobilization

Mi-Kyoung Park <sup>†</sup>, Dong-Chan Lee, Yuan Li, and Luping Yu

Department of Chemistry and The James Frank Institute, The University of Chicago,  
Chicago, Illinois 60637

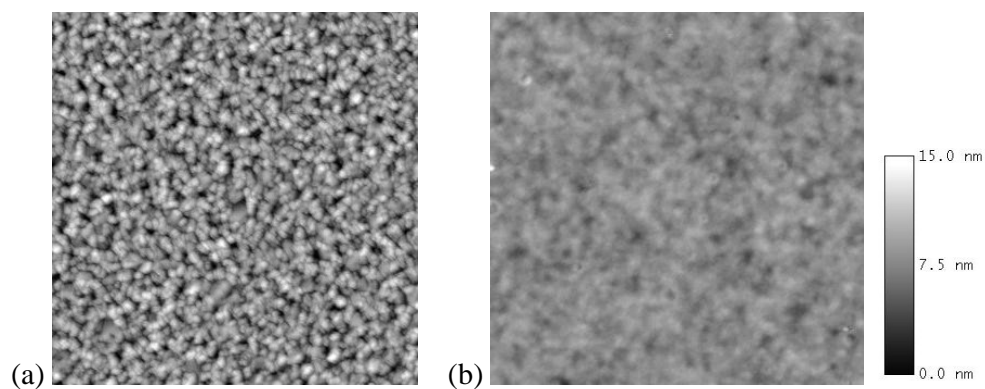

**Figure 1S.** AFM images of (a) a bare gold substrate and (b) after deposition of 8 layers of P-CHO/P-NH<sub>2</sub>. Image size is 2  $\mu$ M x 2  $\mu$ M.

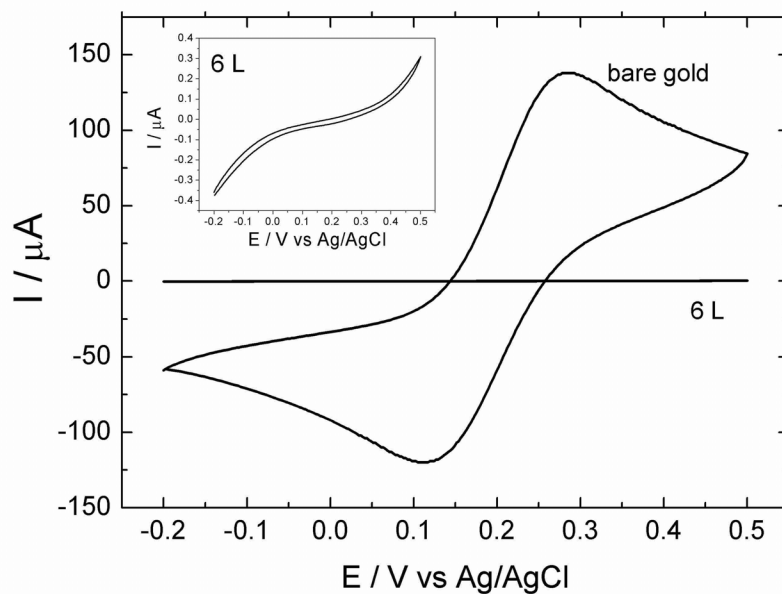

**Figure 2S.** Cyclic voltammograms of a bare gold substrate and 6 layers of polymer deposited on the gold substrate (inset: in smaller scale) in solutions containing 1 mM each of  $\text{Fe}(\text{CN})_6^{3-/4-}$  with 0.1 M NaCl buffered with 10 mM  $\text{Na}_2\text{HPO}_4$  (pH = 7.5). The scan rate is 40 mV/s.
